# Supplementary material for: Oral Tolerance Induction to Newly Introduced Allergen is Favored by a Transforming Growth Factor-β-Enriched Formula
Source: MDPI journal article supplement (doi:10.3390/nu11092210), 2019-09-13
Supplement: s1 [file s1]

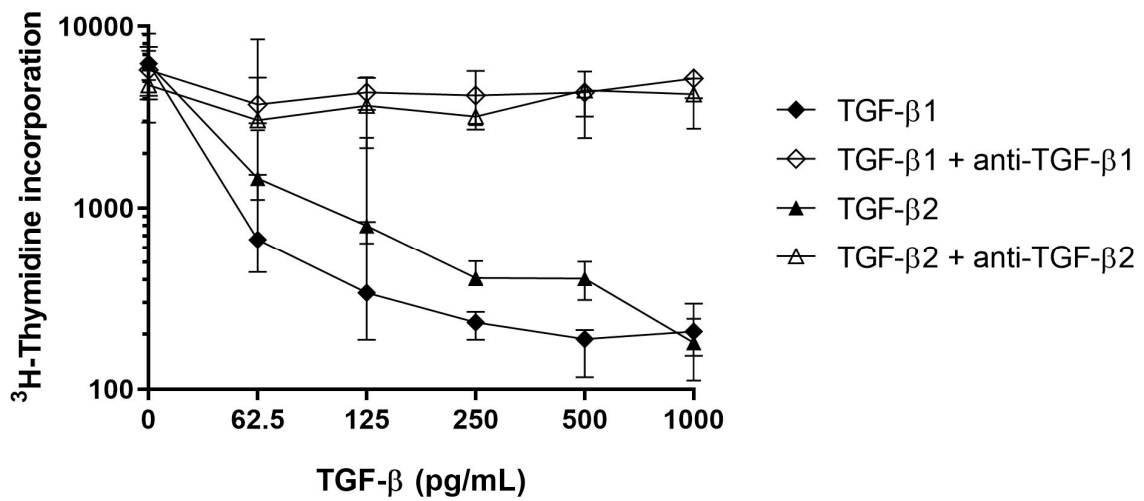

**Figure S1.** Effect of TGF-β1 and TGF-β2 on the inhibition of <sup>3</sup>H-thymidine incorporation in Mv 1 Lu cell cultures. Mv 1 Lu cells were exposed to serial dilutions of recombinant TGF-β1 or TGF-β2 with or without anti-TGF-β1 or anti-TGF-β2, respectively. Values are expressed as the median ± interquartile range. Results are representative of one experiment out of three performed with four replicates.
